# Supplementary material for: Patient-Pathway Analysis of Tuberculosis Services in Cameroon
Source: Trop Med Infect Dis. 2021 Sep 22;6(4):171. doi: 10.3390/tropicalmed6040171 (PMC8544654; doi:10.3390/tropicalmed6040171)
Supplement: Supplementary file 1 [file tropicalmed-06-00171-s001.zip › resupplementary-1336640.pdf]

Supplementary file.

Patient-pathway analysis of tuberculosis services in Cameroon.

**Table S1.** Health facility coding for Patient-pathway analysis (PPA) in Cameroon

| Data Source, Health Facility Type                                 | Categorization         |                       |
|-------------------------------------------------------------------|------------------------|-----------------------|
|                                                                   | Health Facility Sector | Health Facility Level |
| <b>2018 Demographic and Health Survey</b>                         |                        |                       |
| Government hospital                                               | Public                 | 2                     |
| Government health center                                          | Public                 | 1                     |
| Health worker/field worker                                        | Public                 | 0                     |
| Other public                                                      | Public                 | 0                     |
| Private confessional hospital, clinic                             | Private                | 2                     |
| Lay private hospital/clinic                                       | Private                | 2                     |
| Confessional health center                                        | Private                | 1                     |
| Medical cabinet                                                   | Private                | 0                     |
| Other private medical                                             | Private                | 0                     |
| Pharmacy                                                          | Informal Private       | 0                     |
| Informal seller of drug                                           | Informal Private       | 0                     |
| Traditional practitioner                                          | Informal Private       | 0                     |
| NGO                                                               | Informal Private       | 0                     |
| Store                                                             | Informal Private       | 0                     |
| Community relay/worker                                            | Informal Private       | 0                     |
| Other                                                             | Informal Private       | 0                     |
| <b>Cameroon Health Facility List and National TB Program data</b> |                        |                       |
| General Hospital*                                                 | Public                 | 3                     |
| Central Hospital*                                                 | Public                 | 3                     |
| Regional Hospital*                                                | Public                 | 3                     |
| District Hospital                                                 | Public                 | 2                     |
| Integrated health center (CSI)                                    | Public                 | 1                     |
| Sub-divisional medical center (CMA)                               | Public                 | 1                     |
| Prison†                                                           | Public                 | 1                     |
| Hospital                                                          | Private                | 2                     |
| Clinic                                                            | Private                | 1                     |
| Health center                                                     | Private                | 1                     |
| Medical cabinet                                                   | Private                | 0                     |

\*The Level 3 public structures in the health facility list have been merged with the Level 2 public structures for the analysis to facilitate alignment with the DHS care seeking data. †The NTP-supervised facilities are a sub-set of the Health Facility list, with the exception of prisons; the NTP supervises 4 prisons that have both TB diagnostic and treatment services and are not included on the Health Facility List.

| Region    | Type of facility | Care seeking %             | Dx/Tx access %             |
|-----------|------------------|----------------------------|----------------------------|
| National  | Informal Private | <div><div></div></div> 32% | <div><div></div></div> 0%  |
|           | Private          | <div><div></div></div> 40% | <div><div></div></div> 3%  |
|           | Public           | <div><div></div></div> 29% | <div><div></div></div> 6%  |
| Adamawa   | Informal Private | <div><div></div></div> 23% | <div><div></div></div> 0%  |
|           | Private          | <div><div></div></div> 38% | <div><div></div></div> 2%  |
|           | Public           | <div><div></div></div> 39% | <div><div></div></div> 14% |
| Centre    | Informal Private | <div><div></div></div> 21% | <div><div></div></div> 0%  |
|           | Private          | <div><div></div></div> 55% | <div><div></div></div> 3%  |
|           | Public           | <div><div></div></div> 24% | <div><div></div></div> 9%  |
| East      | Informal Private | <div><div></div></div> 19% | <div><div></div></div> 0%  |
|           | Private          | <div><div></div></div> 48% | <div><div></div></div> 2%  |
|           | Public           | <div><div></div></div> 33% | <div><div></div></div> 7%  |
| Far North | Informal Private | <div><div></div></div> 54% | <div><div></div></div> 0%  |
|           | Private          | <div><div></div></div> 10% | <div><div></div></div> 2%  |
|           | Public           | <div><div></div></div> 36% | <div><div></div></div> 3%  |
| Littoral  | Informal Private | <div><div></div></div> 15% | <div><div></div></div> 0%  |
|           | Private          | <div><div></div></div> 64% | <div><div></div></div> 3%  |
|           | Public           | <div><div></div></div> 21% | <div><div></div></div> 9%  |
| North     | Informal Private | <div><div></div></div> 60% | <div><div></div></div> 0%  |
|           | Private          | <div><div></div></div> 9%  | <div><div></div></div> 0%  |
|           | Public           | <div><div></div></div> 31% | <div><div></div></div> 2%  |
| Northwest | Informal Private | <div><div></div></div> 29% | <div><div></div></div> 0%  |
|           | Private          | <div><div></div></div> 26% | <div><div></div></div> 4%  |
|           | Public           | <div><div></div></div> 46% | <div><div></div></div> 7%  |
| West      | Informal Private | <div><div></div></div> 21% | <div><div></div></div> 0%  |
|           | Private          | <div><div></div></div> 59% | <div><div></div></div> 3%  |
|           | Public           | <div><div></div></div> 20% | <div><div></div></div> 3%  |
| South     | Informal Private | <div><div></div></div> 39% | <div><div></div></div> 0%  |
|           | Private          | <div><div></div></div> 36% | <div><div></div></div> 2%  |
|           | Public           | <div><div></div></div> 25% | <div><div></div></div> 7%  |

**Figure S1.** Proportion of people by reported place of initial care seeking and with access to TB testing (Dx) and treatment (Tx) services at initial care seeking, by health facility type and region
